# Supplementary material for: The Environmental Profile of Ecuadorian Export Banana: A Life Cycle Assessment
Source: MDPI journal article supplement (doi:10.3390/foods11203288), 2022-10-20
Supplement: s1 [file s1]

## Supplementary Information

### S1. Life cycle inventory

#### S1.1 Banana at-the-farm-gate

**Table S1.** Inventory of inputs and outputs per functional unit (1Ton) Banana at-the-farm-gate.

| Inputs                                    |          |          |      |              |                                                                                             |
|-------------------------------------------|----------|----------|------|--------------|---------------------------------------------------------------------------------------------|
| Flow                                      | Amount   |          | Unit | Flow type    | Life cycle inventory source                                                                 |
|                                           | 2019     | 2020     |      |              |                                                                                             |
| Algae (Laminaria), dried, consumption mix | 1.72E-02 | 1.73E-02 | kg   | Product flow | Ecoinvent [34] Algae (Laminaria), dried, consumption mix - FR                               |
| Alkyl sulphate (C12-14)                   | 1.24E-03 | 3.11E-05 | kg   | Product flow | Ecoinvent [34] market for alkyl sulphate (C12-14)   alkyl sulphate (C12-14)   APOS, U - GLO |
| Aminopyridine                             | 1.18E-02 | 8.30E-03 | kg   | Product flow | Ecoinvent [34] market for aminopyridine   aminopyridine   APOS, U - RoW                     |
| Ammonium nitrate, as N                    | 2.56E+00 | 1.40E+00 | kg   | Product flow | Ecoinvent [34] market for ammonium nitrate, as N   ammonium nitrate, as N   APOS, U - GLO   |
| Ammonium sulfate, as N                    | 9.85E-01 | 7.63E-01 | kg   | Product flow | Ecoinvent [34] market for ammonium sulfate, as N   ammonium sulfate, as N   APOS, U - GLO   |
| Benzoic acid                              | 1.06E-03 | 6.47E-02 | kg   | Product flow | Ecoinvent [34] market for benzoic acid   benzoic acid   APOS, U - RoW                       |
| Bipyridylium-compound                     | 1.79E-02 | 6.68E-03 | kg   | Product flow | Ecoinvent [34] market for bipyridylium-compound   bipyridylium-compound   APOS, U - GLO     |
| Butyrolactone                             | 1.24E-03 | 1.57E-03 | kg   | Product flow | Ecoinvent [34] market for butyrolactone   butyrolactone   APOS, U - RoW                     |

|                                                   |              |              |      |              |                                                                                                                 |
|---------------------------------------------------|--------------|--------------|------|--------------|-----------------------------------------------------------------------------------------------------------------|
| Calcium carbonate                                 | 4.12E-02     | 1.33E-02     | kg   | Product flow | Ecoinvent [34] market for calcium carbonate, precipitated   calcium carbonate, precipitated   APOS, U - RoW     |
| Calcium nitrate                                   | 1.12E-04     | 7.56E-05     | kg   | Product flow | Ecoinvent [34] market for calcium nitrate   calcium nitrate   APOS, U - GLO                                     |
| Chlorothalonil                                    | 1.22E-02     | 6.21E-03     | kg   | Product flow | Ecoinvent [34] market for chlorothalonil   chlorothalonil   APOS, U - GLO                                       |
| Diammonium phosphate (DAP) (with 18% N, 46% P2O5) | 1.80E+0<br>0 | 2.55E+0<br>0 | kg   | Product flow | Ecoinvent [34] Diammonium phosphate (18% N 46% P2O5), at plant (WFLDB 3.5) - RER                                |
| Dithiocarbamated-compound                         | 1.33E-03     | 6.63E-03     | kg   | Product flow | Ecoinvent [34] market for dithiocarbamate-compound   dithiocarbamate-compound   APOS, U - GLO                   |
| Esters of versatic acid                           | 2.13E-03     | 1.29E-01     | kg   | Product flow | Ecoinvent [34] market for esters of versatic acid   esters of versatic acid   APOS, U - RoW                     |
| Ethylene glycol                                   | 0.00E+0<br>0 | 2.00E-03     | kg   | Product flow | Ecoinvent [34] market for ethylene glycol   ethylene glycol   APOS, U - GLO                                     |
| Fruit tree seedling, for planting                 | 2.27E+0<br>0 | 2.84E+0<br>0 | item | Product flow | Ecoinvent [34] market for fruit tree seedling, for planting   fruit tree seedling, for planting   APOS, U - GLO |
| Glyphosate                                        | 1.01E-02     | 9.76E-03     | kg   | Product flow | Ecoinvent [34] market for glyphosate   glyphosate   APOS, U - GLO                                               |
| Limestone, crushed, for mill                      | 1.49E+0<br>0 | 4.43E-01     | kg   | Product flow | Ecoinvent [34] market for limestone, crushed, for mill   limestone, crushed, for mill   APOS, U - RoW           |
| Lubricant oil                                     | 5.37E-02     | 7.00E-02     | kg   | Product flow | Ecoinvent [34] market for lubricating oil   lubricating oil   APOS, U - RoW                                     |
| Magnesium                                         | 1.77E-09     | 1.07E-09     | kg   | Product flow | Ecoinvent [34] market for magnesium   magnesium   APOS, U - GLO                                                 |
| Magnesium sulfate                                 | 3.15E-01     | 2.30E-01     | kg   | Product flow | Ecoinvent [34] market for magnesium sulfate   magnesium sulfate   APOS, U - GLO                                 |
| Mancozeb                                          | 4.06E-02     | 3.92E-02     | kg   | Product flow | Ecoinvent [34] market for mancozeb   mancozeb   APOS, U - GLO                                                   |

|                                                |          |          |                   |                 |                                                                                                                           |
|------------------------------------------------|----------|----------|-------------------|-----------------|---------------------------------------------------------------------------------------------------------------------------|
| Nitrogen fertiliser, as N                      | 1.20E-01 | 3.52E-01 | kg                | Product flow    | Ecoinvent [34] market for nitrogen fertiliser, as N   nitrogen fertiliser, as N   APOS, U - GLO                           |
| Occupation, agriculture                        | 2.42E+02 | 2.67E+02 | m <sup>2</sup> *a | Elementary flow | -                                                                                                                         |
| Organic fertiliser, 3-2-3, granulate, packaged | 2.28E+00 | 6.69E+00 | kg                | Product flow    | Ecoinvent [34] Organic fertiliser, 3-2-3, granulate, packaged                                                             |
| Organophosphorus-compound, unspecified         | 6.64E-02 | 6.29E-02 | kg                | Product flow    | Ecoinvent [34] market for organophosphorus-compound, unspecified   organophosphorus-compound, unspecified   APOS, U - GLO |
| Packaging film, low density polyethylene       | 1.18E+00 | 1.29E+00 | kg                | Product flow    | Ecoinvent [34] market for packaging film, low density polyethylene - GLO                                                  |
| Pesticide, unspecified                         | 1.43E-02 | 6.29E-03 | kg                | Product flow    | Ecoinvent [34] market for pesticide, unspecified   pesticide, unspecified   APOS, U - GLO                                 |
| Petrol, unleaded, burned in machinery          | 5.65E+00 | 5.49E+00 | MJ                | Product flow    | Ecoinvent [34] market for petrol, unleaded, burned in machinery   petrol, unleaded, burned in machinery   APOS, U - GLO   |
| Petrol, unleaded, burned in machinery          | 1.77E+01 | 1.83E+01 | MJ                | Product flow    | Ecoinvent [34] market for petrol, unleaded, burned in machinery   petrol, unleaded, burned in machinery   APOS, U - GLO   |
| Phosphate fertiliser, as P2O5                  | 2.79E-04 | 4.80E-04 | kg                | Product flow    | Ecoinvent [34] market for phosphate fertiliser, as P2O5   phosphate fertiliser, as P2O5   APOS, U - GLO                   |
| Piperidine                                     | 2.36E-02 | 1.53E-02 | kg                | Product flow    | Ecoinvent [34] market for piperidine   piperidine   APOS, U - GLO                                                         |
| Plastic cork stopper, PA, at plant             | 9.95E-01 | 6.23E-01 | kg                | Product flow    | Ecoinvent [34] Bag, LDPE, at plant   Plastic cork stopper, at plant - RER                                                 |
| Plastic film, PA, at plant                     | 3.75E-01 | 4.20E-01 | kg                | Product flow    | Ecoinvent [34] Plastic film, PA, at plant (ACYVIA) - RER                                                                  |
| Plastic film, PA, at plant                     | 1.30E-02 | 1.61E-02 | kg                | Product flow    | Ecoinvent [34] Plastic film, PA, at plant (ACYVIA) - RER                                                                  |
| Polypropylene, granulate                       | 2.00E-01 | 7.47E-01 | kg                | Product flow    | Ecoinvent [34] market for polypropylene, granulate   polypropylene, granulate   APOS, U - GLO                             |

| Polypropylene, granulate          | 1.55E-02 | 2.90E-02 | kg             | Product flow        | Ecoinvent [34] market for polypropylene, granulate   polypropylene, granulate   APOS, U - GLO         |
|-----------------------------------|----------|----------|----------------|---------------------|-------------------------------------------------------------------------------------------------------|
| Potassium chloride (with 60% K2O) | 1.81E+01 | 1.79E+01 | kg             | Product flow        | Ecoinvent [34] Potassium chloride (60% K2O), at plant (WFLDB 3.5) - RER                               |
| Potassium fertiliser, as K2O      | 1.91E-03 | 2.58E-03 | kg             | Product flow        | Ecoinvent [34] market for potassium fertiliser, as K2O   potassium fertiliser, as K2O   APOS, U - GLO |
| Urea, as N                        | 2.70E+00 | 4.77E+00 | kg             | Product flow        | Ecoinvent [34] market for urea, as N   urea, as N   APOS, U - GLO                                     |
| Water pump operation, diesel      | 3.50E+02 | 4.35E+02 | MJ             | Product flow        | Ecoinvent [34] water pump operation, diesel   water pump operation, diesel   APOS, U - PE             |
| Water, river                      | 9.02E+01 | 1.25E+02 | m <sup>3</sup> | Elementary flow     | -                                                                                                     |
| Outputs                           |          |          |                |                     |                                                                                                       |
| Flow                              | Amount   |          | Unit           | Flow type           | Life cycle inventory source                                                                           |
|                                   | 2019     | 2020     |                |                     |                                                                                                       |
| Ammonia                           | 6,87E-01 | 1,06E+00 | kg             | Elementary flow     | -                                                                                                     |
| Banana at the farm gate           | 1,00E+00 | 1,00E+00 | Mg             | <b>Product flow</b> | -                                                                                                     |
| Carbon dioxide                    | 4,98E+00 | 7,80E+00 | kg             | Elementary flow     | -                                                                                                     |
| Chlorothalonil                    | 5,05E-04 | 2,57E-04 | kg             | Elementary flow     | -                                                                                                     |
| Chlorothalonil                    | 9,46E-04 | 4,81E-04 | kg             | Elementary flow     | -                                                                                                     |
| Chlorothalonil                    | 5,28E-07 | 2,68E-07 | kg             | Elementary flow     | -                                                                                                     |

|                      |          |          |    |                    |   |
|----------------------|----------|----------|----|--------------------|---|
| Dinitrogen monoxide  | 3,46E-01 | 3,99E-01 | kg | Elementary<br>flow | - |
| Diquat               | 1,83E-04 | 6,60E-05 | kg | Elementary<br>flow | - |
| Diquat               | 5,76E-03 | 2,08E-03 | kg | Elementary<br>flow | - |
| Diquat               | 1,53E-10 | 5,51E-11 | kg | Elementary<br>flow | - |
| Fenpropidin          | 2,35E-02 | 1,53E-02 | kg | Elementary<br>flow | - |
| Glufosinate-ammonium | 1,28E-03 | 1,15E-03 | kg | Elementary<br>flow | - |
| Glufosinate-ammonium | 1,78E-05 | 1,59E-05 | kg | Elementary<br>flow | - |
| Glufosinate-ammonium | 2,94E-06 | 2,64E-06 | kg | Elementary<br>flow | - |
| Glyphosate           | 1,83E-04 | 1,77E-04 | kg | Elementary<br>flow | - |
| Glyphosate           | 3,13E-03 | 3,03E-03 | kg | Elementary<br>flow | - |
| Glyphosate           | 4,35E-06 | 4,21E-06 | kg | Elementary<br>flow | - |
| Imidacloprid         | 3,27E-05 | 3,26E-05 | kg | Elementary<br>flow | - |
| Imidacloprid         | 1,02E-03 | 1,02E-03 | kg | Elementary<br>flow | - |
| Imidacloprid         | 2,08E-07 | 2,08E-07 | kg | Elementary<br>flow | - |
| Mancozeb             | 7,28E-04 | 7,05E-04 | kg | Elementary<br>flow | - |

|                 |              |              |    |                    |   |
|-----------------|--------------|--------------|----|--------------------|---|
| Mancozeb        | 2,86E-14     | 2,77E-14     | kg | Elementary<br>flow | - |
| Mancozeb        | 4,90E-15     | 4,76E-15     | kg | Elementary<br>flow | - |
| Metiram         | 2,38E-05     | 1,19E-04     | kg | Elementary<br>flow | - |
| Metiram         | 1,16E-10     | 5,77E-10     | kg | Elementary<br>flow | - |
| Metiram         | 2,12E-11     | 1,05E-10     | kg | Elementary<br>flow | - |
| Nitrate         | 4,81E+0<br>1 | 5,73E+0<br>1 | kg | Elementary<br>flow | - |
| Nitrogen oxides | 7,26E-02     | 8,39E-02     | kg | Elementary<br>flow | - |
| Paraquat        | 1,58E-04     | 6,14E-05     | kg | Elementary<br>flow | - |
| Paraquat        | 4,97E-03     | 1,93E-03     | kg | Elementary<br>flow | - |
| Paraquat        | 1,32E-10     | 5,00E-11     | kg | Elementary<br>flow | - |
| Phosphate       | 1,60E-04     | 2,20E-04     | kg | Elementary<br>flow | - |
| Pyrimethanil    | 2,30E-04     | 1,62E-04     | kg | Elementary<br>flow | - |
| Pyrimethanil    | 9,55E-07     | 6,71E-07     | kg | Elementary<br>flow | - |
| Pyrimethanil    | 1,33E-07     | 9,35E-08     | kg | Elementary<br>flow | - |
| Spiroxamine     | 1,22E-02     | 3,41E-03     | kg | Elementary<br>flow | - |

|                       |              |          |    |                    |                                                                                                                                   |
|-----------------------|--------------|----------|----|--------------------|-----------------------------------------------------------------------------------------------------------------------------------|
| Terbufos              | 5,57E-05     | 3,43E-05 | kg | Elementary<br>flow | -                                                                                                                                 |
| Terbufos              | 3,29E-04     | 2,03E-04 | kg | Elementary<br>flow | -                                                                                                                                 |
| Terbufos              | 5,41E-08     | 3,33E-08 | kg | Elementary<br>flow | -                                                                                                                                 |
| Thiamethoxam          | 5,73E-05     | 3,48E-03 | kg | Elementary<br>flow | -                                                                                                                                 |
| Thiamethoxam          | 1,03E-03     | 6,27E-02 | kg | Elementary<br>flow | -                                                                                                                                 |
| Triflusulfuron-methyl | 3,22E-06     | 1,42E-05 | kg | Elementary<br>flow | -                                                                                                                                 |
| Triflusulfuron-methyl | 2,36E-06     | 1,04E-05 | kg | Elementary<br>flow | -                                                                                                                                 |
| Triflusulfuron-methyl | 1,49E-08     | 6,54E-08 | kg | Elementary<br>flow | -                                                                                                                                 |
| waste polyethylene    | 1,08E+0<br>0 | 7,85E-01 | kg | Waste flow         | Ecoinvent [34] treatment of waste polyethylene, open dump, dry<br>infiltration class (100mm)   waste polyethylene   APOS, U - GLO |

---

## S1.2 Banana at-the-packaging-stage-gate

**Table S2.** Inventory of inputs and outputs per functional unit (1Ton) Banana at-the-packaging-stage-gate

| Inputs                                                |          |          |      |              |                                                                                                                                                   |
|-------------------------------------------------------|----------|----------|------|--------------|---------------------------------------------------------------------------------------------------------------------------------------------------|
| Flow                                                  | Amount   |          | Unit | Flow type    | Life cycle inventory source                                                                                                                       |
|                                                       | 2019     | 2020     |      |              |                                                                                                                                                   |
| Alkylbenzene sulfonate, linear, petrochemical         | 8.11E-02 | 7.71E-02 | kg   | Product flow | Ecoinvent [34] market for alkylbenzene sulfonate, linear, petrochemical   alkylbenzene sulfonate, linear, petrochemical   APOS, U - GLO           |
| Aluminium sulfate, powder                             | 4.90E-02 | 4.76E-02 | kg   | Product flow | Ecoinvent [34] market for aluminium sulfate, powder   aluminium sulfate, powder   APOS, U - RoW                                                   |
| Ammonium chloride                                     | 5.71E-02 | 1.35E-02 | Kg   | Product flow | Ecoinvent [34] market for ammonium chloride   ammonium chloride   APOS, U - GLO                                                                   |
| Banana at the farm gate                               | 1.05E+00 | 1.05E+00 | ton  | Product flow | -                                                                                                                                                 |
| Benzimidazole-compound                                | 1.24E-02 | 1.09E-02 | kg   | Product flow | Ecoinvent [34] market for benzimidazole-compound   benzimidazole-compound   APOS, U - GLO                                                         |
| Carton board box production                           | 7.08E+01 | 8.12E+01 | kg   | Product flow | Ecoinvent [34] market for carton board box production, with gravure printing   carton board box production, with gravure printing   APOS, U - GLO |
| Chlorinated alkaline detergent, with gravure printing | 1.68E-03 | 9.48E-03 | kg   | Product flow | Ecoinvent [34] Chlorinated alkaline detergent, for the meat industry, at plant - RER                                                              |
| Citric acid                                           | 1.56E-03 | 1.00E-03 | kg   | Product flow | Ecoinvent [34] market for citric acid   citric acid   APOS, U - GLO                                                                               |
| Electricity, low voltage                              | 1.59E+01 | 1.66E+01 | kWh  | Product flow | Ramirez, et al. [37] Electricity, at supply, 2018 mix - EC                                                                                        |
| Generic detergent-disinfectant                        | 1.24E-02 | 4.17E-02 | kg   | Product flow | Ecoinvent [34] Generic detergent-disinfectant, at plant - RER                                                                                     |



| Hydrogen peroxide                        | 4.55E-02 | 4.35E-03 | kg   | Product flow    | Ecoinvent [34] market for hydrogen peroxide, without water, in 50% solution state   hydrogen peroxide, without water, in 50% solution state   APOS, U - RoW |
|------------------------------------------|----------|----------|------|-----------------|-------------------------------------------------------------------------------------------------------------------------------------------------------------|
| Imidazole                                | 4.13E-03 | 1.52E-03 | kg   | Product flow    | Ecoinvent [34] market for imidazole   imidazole   APOS, U - GLO                                                                                             |
| Monochlorobenzene                        |          | 2.62E-03 | kg   | Product flow    | Ecoinvent [34] market for monochlorobenzene   monochlorobenzene   APOS, U - RoW                                                                             |
| Non-ionic surfactant                     | 2.57E-04 | 1.87E-02 | kg   | Product flow    | Ecoinvent [34] market for non-ionic surfactant   non-ionic surfactant   APOS, U - GLO                                                                       |
| Packaging film, low density polyethylene | 2.00E+00 | 2.30E+00 | kg   | Product flow    | Ecoinvent [34] market for packaging film, low density polyethylene   packaging film, low density polyethylene   APOS, U - GLO                               |
| Soybean oil, crude                       | 2.41E-02 | 2.60E-02 | kg   | Product flow    | Ecoinvent [34] market for soybean oil, crude   soybean oil, crude   APOS, U - GLO                                                                           |
| Sulfuric acid                            | 1.25E-01 | 9.26E+00 | kg   | Product flow    | Ecoinvent [34] market for sulfuric acid   sulfuric acid   APOS, U - RoW                                                                                     |
| Tap water                                | 4.04E+02 | 4.45E+02 | kg   | Product flow    | Ecoinvent [34] market for tap water   tap water   APOS, U - PE                                                                                              |
| Vinyl acetate                            |          | 1.10E-02 | kg   | Product flow    | Ecoinvent [34] market for vinyl acetate   vinyl acetate   APOS, U - GLO                                                                                     |
| Outputs                                  |          |          |      |                 |                                                                                                                                                             |
| Flow                                     | Amount   |          | Unit | Flow type       | Life cycle inventory source                                                                                                                                 |
|                                          | 2019     | 2020     |      |                 |                                                                                                                                                             |
| Azoxystrobin                             |          | 4,82E-05 | kg   | Elementary flow | -                                                                                                                                                           |
| Azoxystrobin                             |          | 1,15E-03 | kg   | Elementary flow | -                                                                                                                                                           |

|                                    |          |          |    |                     |                                          |
|------------------------------------|----------|----------|----|---------------------|------------------------------------------|
| Azoxystrobin                       |          | 1,34E-07 | kg | Elementary flow     | -                                        |
| Banana at the packaging stage gate | 1,00E+00 | 1,00E+00 | Mg | <b>Product flow</b> | -                                        |
| Prochloraz                         | 2,58E-04 | 1,93E-04 | kg | Elementary flow     | -                                        |
| Prochloraz                         | 8,92E-03 | 6,70E-03 | kg | Elementary flow     | -                                        |
| Prochloraz                         | 9,65E-07 | 7,24E-07 | kg | Elementary flow     | -                                        |
| Rachis, after banana packaging     | 4,78E+02 | 3,27E+02 | kg | Waste flow          | (This study) Banana_Rachis disposal - EC |

---

## S2. Final disposition of the rachis at the “Banana Packaging Stage”

For describe the three scenarios of the final disposal of the rachis, table S3 shows the inventory analysis of the "Rachis, after banana packaging".

**Table S3.** Inventory of inputs and outputs per 1 kg of “Rachis, after banana packaging”, for the RM0 scenario.

| Inputs                         |         |         |      |                 |                                                                                                                                  |
|--------------------------------|---------|---------|------|-----------------|----------------------------------------------------------------------------------------------------------------------------------|
| Flow                           | Amount  |         | Unit | Flow type       | Life cycle inventory source                                                                                                      |
|                                | 2019    | 2020    |      |                 |                                                                                                                                  |
| Rachis, after banana packaging | 1       | 1       | kg   | Waste flow      | (This study) Banana_Rachis disposal - EC                                                                                         |
| Outputs                        |         |         |      |                 |                                                                                                                                  |
| Flow                           | Amount  |         | Unit | Flow type       | Life cycle inventory source                                                                                                      |
|                                | 2019    | 2020    |      |                 |                                                                                                                                  |
| Dinitrogen monoxide            | 4,69E-4 | 3,21E-4 | kg   | Elementary flow |                                                                                                                                  |
| Nitrogen oxides                | 9,85E-5 | 6,74E-5 | kg   | Elementary flow |                                                                                                                                  |
| Waste wood, untreated          | 1       | 1       | kg   | Waste flow      | Ecoinvent [34] treatment of waste wood, untreated, open dump, moist infiltration class (300mm)   waste wood, untreated   APOS, U |

**Table S4.** Inventory of inputs and outputs per 1 kg of “Rachis, after banana packaging”, for the RM1 scenario.

| Inputs                         |         |         |      |                 |                                          |
|--------------------------------|---------|---------|------|-----------------|------------------------------------------|
| Flow                           | Amount  |         | Unit | Flow type       | Life cycle inventory source              |
|                                | 2019    | 2020    |      |                 |                                          |
| Rachis, after banana packaging | 1       | 1       | kg   | Waste flow      | (This study) Banana_Rachis disposal - EC |
| Outputs                        |         |         |      |                 |                                          |
| Flow                           | Amount  |         | Unit | Flow type       | Life cycle inventory source              |
|                                | 2019    | 2020    |      |                 |                                          |
| Dinitrogen monoxide            | 4,69E-4 | 3,21E-4 | kg   | Elementary flow |                                          |
| Nitrogen oxides                | 9,85E-5 | 6,74E-5 | kg   | Elementary flow |                                          |

**Table S5.** Inventory of inputs and outputs per 1 kg of “Rachis, after banana packaging”, for the RM2 scenario.

| Inputs                         |        |      |      |            |                                          |
|--------------------------------|--------|------|------|------------|------------------------------------------|
| Flow                           | Amount |      | Unit | Flow type  | Life cycle inventory source              |
|                                | 2019   | 2020 |      |            |                                          |
| Rachis, after banana packaging | 1      | 1    | kg   | Waste flow | (This study) Banana_Rachis disposal - EC |

The first scenario (RM0) considered all inputs and outputs, including nitrogen emissions from the spine (dinitrogen monoxide and nitrogen oxides) and treatment (wood residues, untreated). The second scenario (RM1) considers all the inputs and outputs, and the nitrogen emissions from the spine. The third scenario (RM2) only includes all inputs and outputs, not counting the rachis. In the column of considered scenarios, indicate the scenario where the flow was used.

### S3. Uncertainty analysis

Figure S1 shows the results obtained in the uncertainty analysis, applying the Monte Carlo model. Performing 500 iterations, using OpenLCA software.

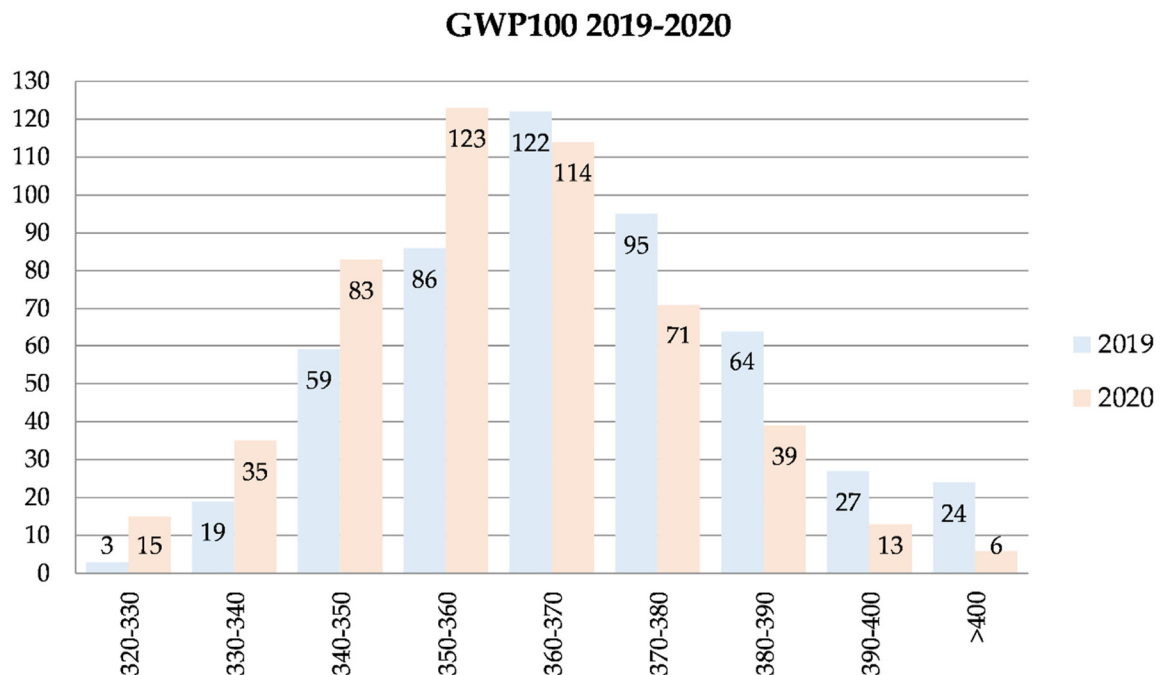

**Figure S1.** Histogram of the uncertainty analysis 2019-2020.

The uncertainty analysis was carried out for the Global Warming Potential (GWP100) category, at the "Banana Packaging Stage", for the RM0 scenario. The largest amount of iterations results are located in the range of 350-370 kg CO<sub>2</sub>-Eq/Ton banana. In 2019, an average of 367,85 kg CO<sub>2</sub>-Eq/Ton banana was obtained with a standard deviation of 17,77 kg CO<sub>2</sub>-Eq/Ton banana. In 2020, an average of 360,17 kg CO<sub>2</sub>-Eq/Ton banana was obtained with a standard deviation of 16,26 kg CO<sub>2</sub>-Eq/Ton banana.

According to the results of this study in 2019 (352 kg CO<sub>2</sub>-Eq/Ton banana), this is in the range of the uncertainty analysis (350.08-385.62 kg CO<sub>2</sub>-Eq/Ton banana). For the year 2020 (342 kg CO<sub>2</sub>-Eq/Ton banana), this is below the range of the uncertainty analysis (343.91-376.43 kg CO<sub>2</sub>-Eq/Ton banana).

### References

34. Ecoinvent The Ecoinvent Database. Available online: <https://www.ecoinvent.org/database/database.html>.
37. Ramirez, A.D.; Boero, A.; Rivela, B.; Melendres, A.M.; Espinoza, S.; Salas, D.A. Life Cycle Methods to Analyze the Environmental Sustainability of Electricity Generation in Ecuador: Is Decarbonization the Right Path? *Renew. Sustain. Energy Rev.* **2020**, *134*, 110373, doi:10.1016/j.rser.2020.110373.
